# Supplementary material for: Social determinants of alcohol-related traumatic injury in young adults: a scoping review protocol
Source: HighWire-hosted journal article supplement (doi:10.1136/bmjopen-2023-074653), 2023-11-01
Supplement: bmjopen-2023-074653supp001_data_supplement.pdf [file bmjopen-2023-074653supp001_data_supplement.pdf]

## APPENDIX 1.0

### Full Search Strategies

The full search used in PubMed is as follows:

("Adult"[MeSH Terms] AND ("Wounds and injuries"[MeSH Terms] AND (("Income"[MeSH Terms] OR "Poverty"[MeSH Terms] OR "income assistance"[Title/Abstract] OR ("Rural population"[MeSH Terms] OR "Rural health"[MeSH Terms] OR "rural occupations"[Title/Abstract]) OR ("Criminal law"[MeSH Terms] OR "Criminals"[MeSH Terms] OR "criminal behaviour"[Title/Abstract]) OR ("Education"[MeSH Terms] OR "Educational Status"[MeSH Terms]) OR ("Public housing"[MeSH Terms] OR "Homeless persons"[MeSH Terms]) OR ("Emigrants and Immigrants"[MeSH Terms] OR "Minority Health"[MeSH Terms]) OR ("Population Dynamics"[MeSH Terms] OR "transient populations"[Title/Abstract]) OR ("Mental health"[MeSH Terms] OR "Mental disorders"[MeSH Terms] OR "mentally ill"[Title/Abstract]) OR ("Pregnancy in adolescence"[MeSH Terms] OR "teenage pregnancy"[Title/Abstract] OR "pregnant teen"[Title/Abstract]) OR ("Child Welfare"[MeSH Terms] OR "Child Protective Services"[MeSH Terms]) OR ("Disabled persons"[MeSH Terms] OR "physical disability"[Title/Abstract] OR "physical disorder"[Title/Abstract])) AND ("Ethanol"[MeSH Terms] OR "Alcohol related disorders"[MeSH Terms] OR "Alcohol drinking"[MeSH Terms] OR "alcohol"[Title/Abstract]))) NOT "Aged"[MeSH Terms]

The full search used in SCOPUS is as follows:

(( ( ( TITLE-ABS-KEY ( income ) OR TITLE-ABS-KEY ( poverty ) OR TITLE-ABS-KEY ( income AND assistance ) ) ) OR ( ( TITLE-ABS-KEY ( rural ) OR TITLE-ABS-KEY ( rural AND health ) OR TITLE-ABS-KEY ( rural AND population ) ) ) OR ( ( TITLE-ABS-KEY ( criminal ) OR TITLE-ABS-KEY ( criminal AND law ) OR TITLE-ABS-KEY ( criminal AND behaviour ) ) ) OR ( ( TITLE-ABS-KEY ( education ) OR TITLE-ABS-KEY ( educational AND status ) ) ) OR ( ( TITLE-ABS-KEY ( homeless ) OR TITLE-ABS-KEY ( homeless AND persons ) OR TITLE-ABS-KEY ( public AND housing ) ) ) OR ( ( TITLE-ABS-KEY ( immigrant ) OR TITLE-ABS-KEY ( immigrants AND emigrants ) OR TITLE-ABS-KEY ( minority AND health ) ) ) OR ( ( TITLE-ABS-KEY ( residential AND mobility ) OR TITLE-ABS-KEY ( transient AND population ) ) ) OR ( ( TITLE-ABS-KEY ( mental AND health ) OR TITLE-ABS-KEY ( mental AND disorders ) OR TITLE-ABS-KEY ( mentally AND ill ) ) ) OR ( ( TITLE-ABS-KEY ( teenage AND pregnancy ) OR TITLE-ABS-KEY ( adolescent AND pregnancy ) OR TITLE-ABS-KEY ( pregnant AND teen ) ) ) OR ( ( TITLE-ABS-KEY ( child AND welfare ) OR TITLE-ABS-KEY ( child AND protective AND services ) ) ) OR ( ( TITLE-ABS-KEY ( physical AND disability ) OR TITLE-ABS-KEY ( physical AND disorder ) OR TITLE-ABS-KEY ( disabled AND persons ) ) ) ) AND ( ( TITLE-ABS-KEY ( alcohol ) OR TITLE-ABS-KEY ( ethanol ) OR TITLE-ABS-KEY ( alcohol AND drinking ) OR TITLE-ABS-KEY ( alcohol AND related AND disorders ) ) ) AND ( ( TITLE-ABS-KEY ( physical AND injury ) OR TITLE-ABS-KEY ( traumatic AND injury ) ) ) AND ( TITLE-ABS-KEY ( adult ) ) ) AND NOT ( ( TITLE-ABS-KEY ( elderly ) OR TITLE-ABS-KEY ( seniors ) ) )

Filters for dates and English language were then applied after the initial search.
